# Psychiatric Services

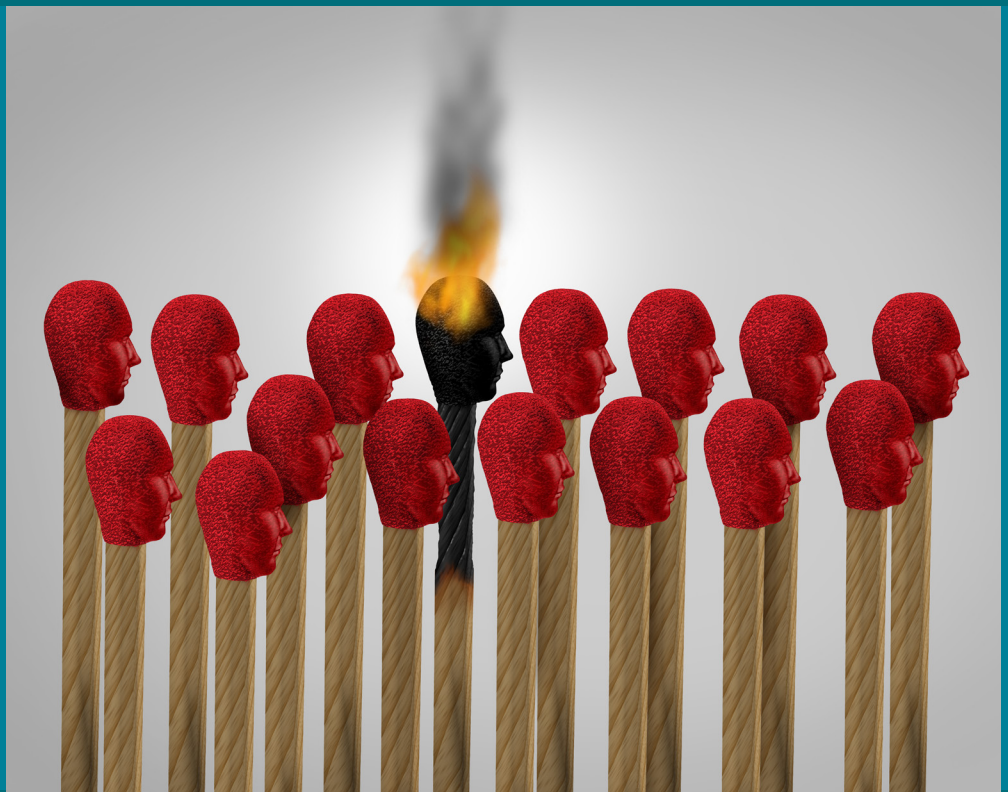

Professional burnout: historical origins of resilience and wellness initiatives

NYC START: critical time intervention for first-episode psychosis

Increased demand on suicide prevention services after a celebrity suicide

Viewpoint: staying patient centered with technological advances
