***The Newest Addition to APA Publishing's Portfolio of Journals***

# The American Journal of Psychotherapy

**psychotherapy.psychiatryonline.org**

**Holly A. Swartz, M.D., Editor-in-Chief**

*The American Journal of Psychotherapy* is a peer-reviewed, interdisciplinary journal published quarterly by the American Psychiatric Association. Begun in 1947 by the Association for the Advancement of Psychotherapy, *The American Journal of Psychotherapy* provides a forum for advancing the theory, science, and clinical practice of psychotherapy, publishing articles that expand the understanding of psychotherapies, especially in the domains of efficacy, process, education, and practice.

The journal publishes empirical papers on psychotherapy outcomes, process, measurement, and education. Maintaining a strong clinical focus, it welcomes case reports, review articles, and training tools that will guide and shape clinical practice.

*The American Journal of Psychotherapy* invites a broad range of perspectives from all psychotherapy disciplines, including but not limited to psychodynamic, interpersonal, cognitive- or dialectical-behavioral, existential, emotion-focused, problem-solving, mentalizing, mindfulness-based, and client-centered approaches.

*The American Journal of Psychotherapy* inclusively addresses topics across treatment modalities, age groups, genders, races and ethnicities, and diagnoses. The journal serves the international community by curating a vibrant, pluralistic, dialogue about psychotherapy that ultimately will inform clinical care.

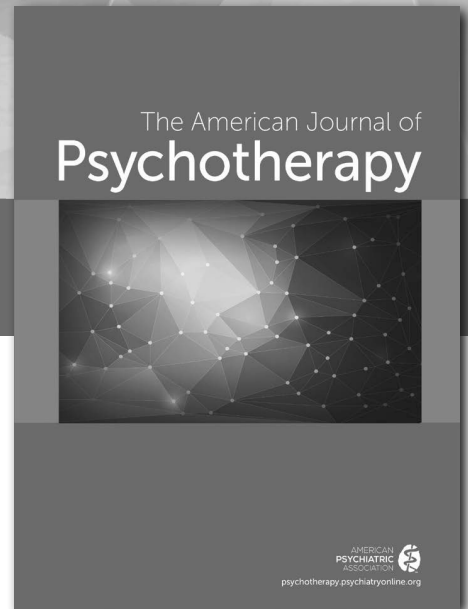

2018 • Vol. 71  
Frequency: Quarterly  
Online ISSN: 2575-6559  
psychotherapy.psychiatryonline.org

**Subscribe Now!** .....

**➤ Visit [appi.org](http://appi.org) for pricing and more information!**

## Enable Psychiatric News Brief

With the American Psychiatric Association's new flash briefing, *Psychiatric News Brief*, you can now listen to synopses of curated articles from *Psychiatric News*. Simply enable this skill and you can listen anytime you choose throughout your day by just saying "Alexa, what's my flash briefing" or "Alexa, tell me what's new".

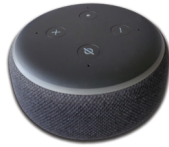

Flash briefing is a customizable Amazon skill that includes updates from your favorite content services. When you say, "Alexa, what's my flash briefing?" or "Alexa, what's the news," you'll hear updates from any organization that you have enabled.

Go to [psychnews.psychiatryonline.org/alexa](https://psychnews.psychiatryonline.org/alexa) to sign up now!

AMERICAN  
PSYCHIATRIC  
ASSOCIATION  
PUBLISHING

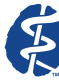

www.appi.org  
Email: [appi@psych.org](mailto:appi@psych.org)  
Phone: 1-800-368-5777

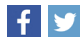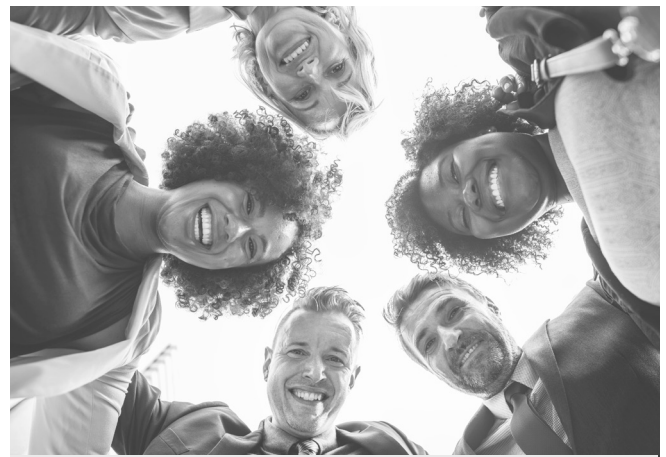

### EXPAND YOUR OPPORTUNITIES AND GROW YOUR CAREER

Join the largest, most dynamic mental health department in the nation and make a difference in the lives of those who need it the most.

- Multiple avenues for advancement and professional development
- Flexible work schedules, unparalleled work-life balance
- Highly competitive benefits
- Competitive starting annual salary with potential bonuses of up to **\$32,000 annually**
- Student loan repayment incentive of up to **\$250,000**
- Reimbursement for eligible relocation expense of up to **\$15,000**

HOPE • RECOVERY • WELLBEING

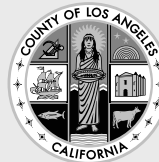

[www.psychiatristjobs.la](http://www.psychiatristjobs.la)

Visit [ps.psychiatryonline.org](https://ps.psychiatryonline.org) for these features!

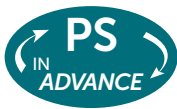

*Discover the latest research before it appears in print*

**Evidence for Differential Predictive Performance of the Prime Screen Between Black and White Help-Seeking Youths**

**Clinical Care Quality Among Veterans Health Administration Patients With Mental Illness Following Medical Home Implementation**

**Family Involvement in Psychiatric Hospitalizations: Associations With Discharge Planning and Prompt Follow-Up Care**

PSYCHIATRIC  
SERVICES

FROM PAGES  
TO PRACTICE

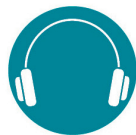

Episode 25: **Services for Autism, Hospitalizations and AOT, and Behavioral Economics for Medication Adherence**

### Editor's Choice

New collection available:

**Substance Use Disorders**

Receive monthly: [appi.org/etocs](https://appi.org/etocs)

View collections: [ps.psychiatryonline.org/editorschoice](https://ps.psychiatryonline.org/editorschoice)

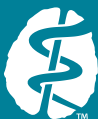



*Ariella, an artist, musician, and real person living with schizophrenia*

SCHIZOPHRENIA  
DIAGNOSIS

EXPERIENCED  
SIDE EFFECTS

STARTED  
COLLEGE

STARTED  
MEDICATION

STOPPED  
MEDICATION

G  
R  
A  
D  
U  
A  
T  
I  
O  
N

# Schizophrenia shouldn't derail her life

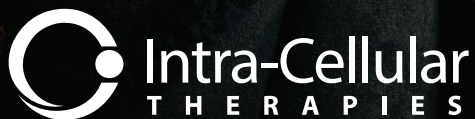

BUILT ON NOBEL PRIZE-WINNING SCIENCE

Visit [SZJourney.com](http://SZJourney.com) to learn more
